# Supplementary material for: 19F NMR enantiodiscrimination and diastereomeric purity determination of amino acids, dipeptides, and amines
Source: Royal Society of Chemistry journal article supplement (doi:10.1039/d3an00761h), 2023-01-01
Supplement: d3an00761h1.pdf [file d3an00761h1.pdf]

# **$^{19}\text{F}$ NMR Enantiodiscrimination and Diastereomeric Purity Determination of Amino Acids, Dipeptides, and Amines**

Lihua Xu<sup>[a]</sup>, Qiong Wang<sup>[b]</sup>, Yan Liu<sup>[d]</sup>, Songsen Fu<sup>[a]\*</sup>, Yufen Zhao<sup>[a][c][d]</sup>, Shaohua Huang<sup>[a]\*</sup>, Biling Huang<sup>[a]\*</sup>

<sup>[a]</sup> Institute of Drug Discovery Technology, Ningbo University, Ningbo, 315211, P.R. China.

<sup>[b]</sup> College of Chemistry, Shandong Normal University, Jinan, 250014, P.R. China.

<sup>[c]</sup> Department of Chemical Biology, College of Chemistry and Chemical Engineering, and the Key Laboratory for Chemical Biology of Fujian Province, Xiamen University, Xiamen, 361005, P.R. China.

<sup>[d]</sup> Key Lab of Bioorganic Phosphorus Chemistry & Chemical Biology, Department of Chemistry, Tsinghua University, Beijing, 100084, P.R. China.

Corresponding author: \*Biling Huang, huangbiling@nbu.edu.cn, ORCID: 0000-0002-1060-8787; \*Shaohua Huang, huangshaohua@nbu.edu.cn; \*Songsen Fu, fusongsen@nbu.edu.cn.

## **Supporting Information**



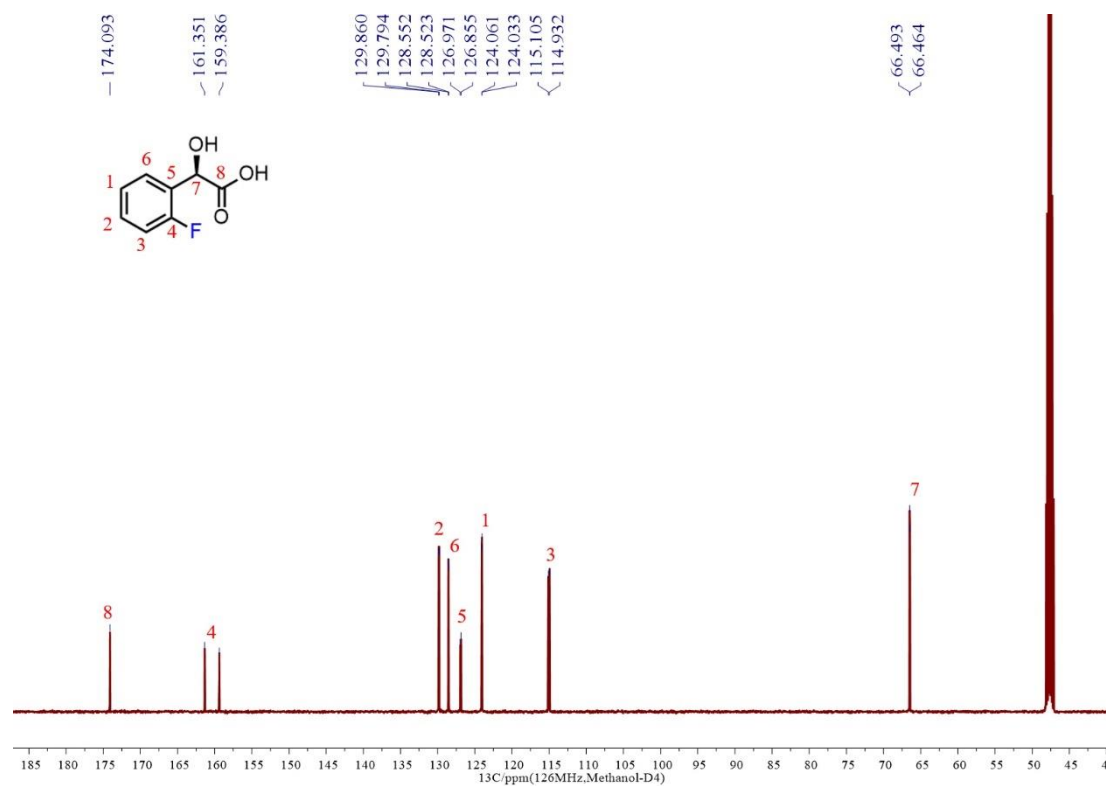

**Figure S2.** <sup>13</sup>C NMR spectrum of (*R*)-2FHA (in MeOH-*d*<sub>4</sub>). <sup>13</sup>C NMR: 174.077 ppm (s, COOH), 162.314 ppm (d, <sup>1</sup>*J*<sub>C-F</sub>, 247.12 Hz, CHF), 129.816 ppm (d, <sup>3</sup>*J*<sub>C-F</sub>, 8.94 Hz, CH), 128.525 ppm (d, <sup>3</sup>*J*<sub>C-F</sub>, 3.73 Hz, CH), 126.895 ppm (d, <sup>2</sup>*J*<sub>C-F</sub>, 14.56 Hz, CH-C-CHF), 124.038 ppm (d, <sup>4</sup>*J*<sub>C-F</sub>, 3.52 Hz, CH), 115.00 ppm (d, <sup>2</sup>*J*<sub>C-F</sub>, 21.56 Hz, CH), 66.471 ppm (d, <sup>3</sup>*J*<sub>C-F</sub>, 3.57 Hz, C-CH-COOH).

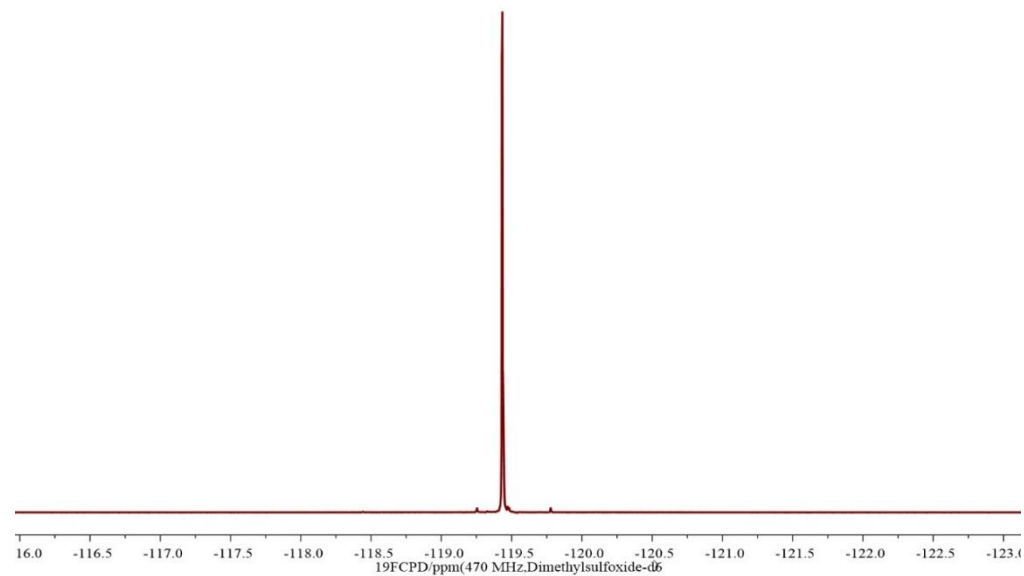

**Figure S3.**  $^{19}\text{F}$  NMR spectrum (decoupling with  $^1\text{H}$  nuclei) of (*R*)-2FHA (in  $\text{DMSO-}d_6$ ).

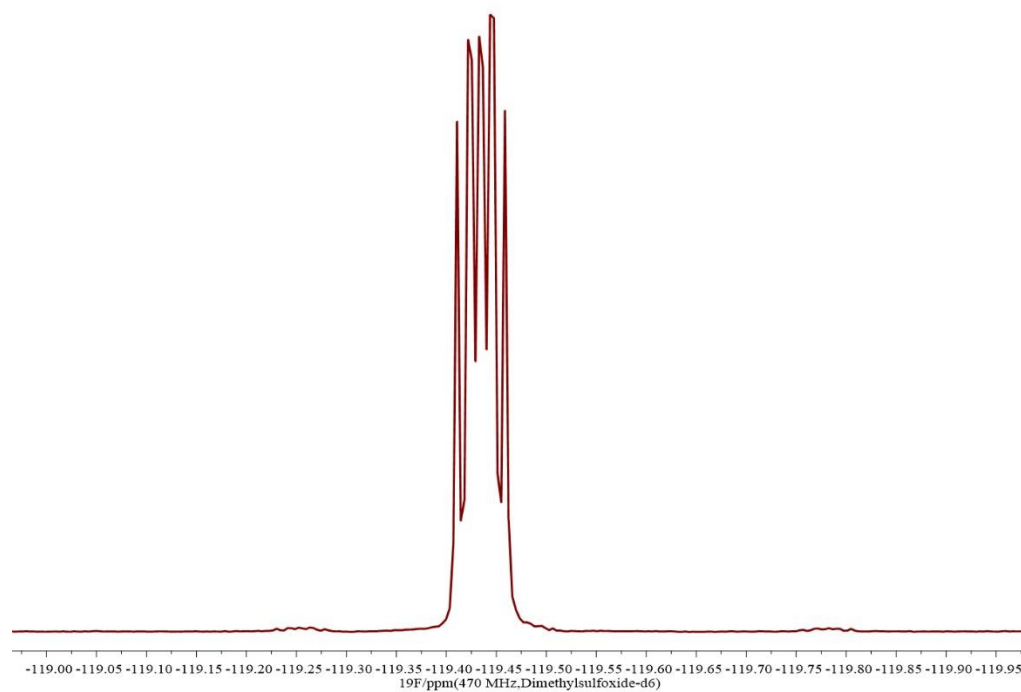

**Figure S4.**  $^{19}\text{F}$  NMR spectrum (coupling with  $^1\text{H}$  nuclei) of  $(R)$ -2FHA (in  $\text{DMSO}-d_6$ ).

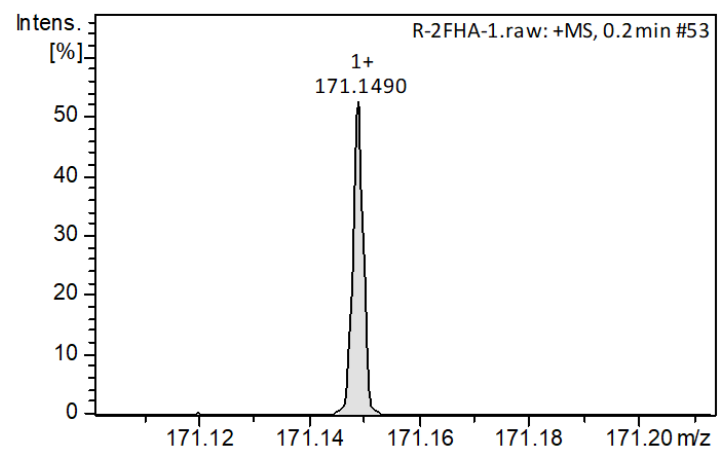

**Figure S5.** High-resolution ESI-MS (HRMS) analysis of the (*R*)-2FHA. HRMS: 171.1474 (calculated  $[M+H]^+$ ), 171.1490 (observed  $[M+H]^+$ ).

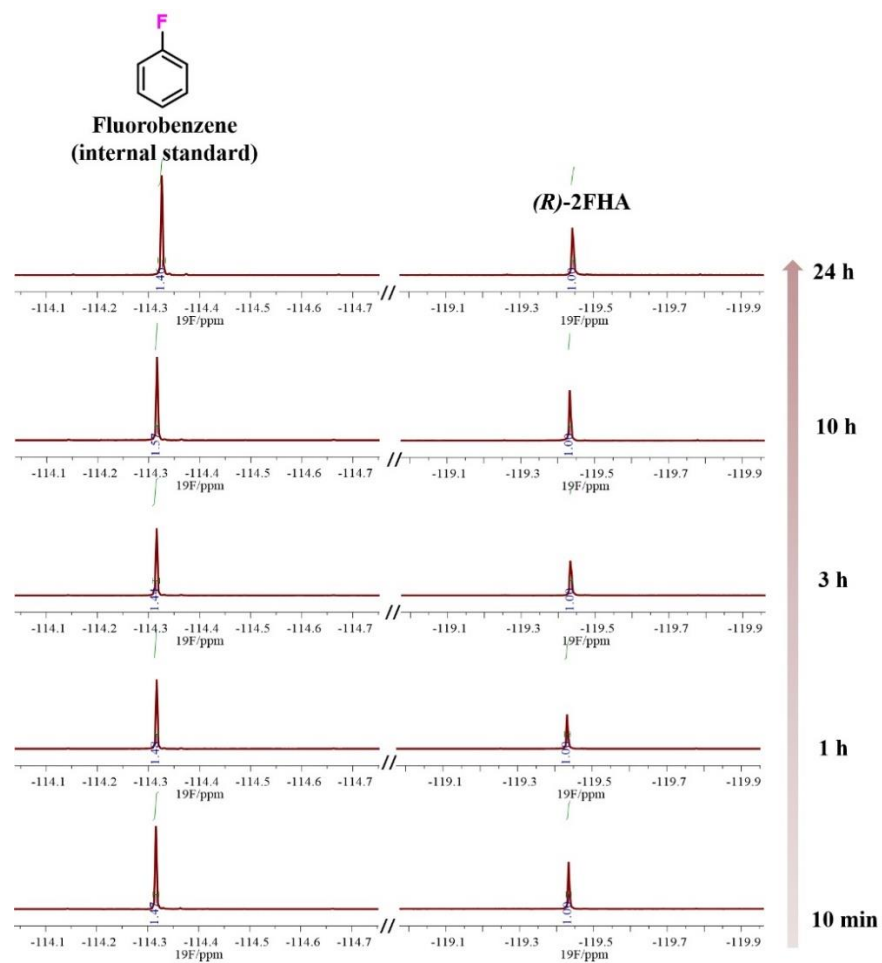

**Figure S6.** Stability of *(R)*-2FHA in EtOH (20 mM) monitored by  $^{19}\text{F}$  NMR spectroscopy. Fluorobenzene (30 mM) was used as an internal standard for integral analysis of  $^{19}\text{F}$  resonance signal of *(R)*-2FHA over time.

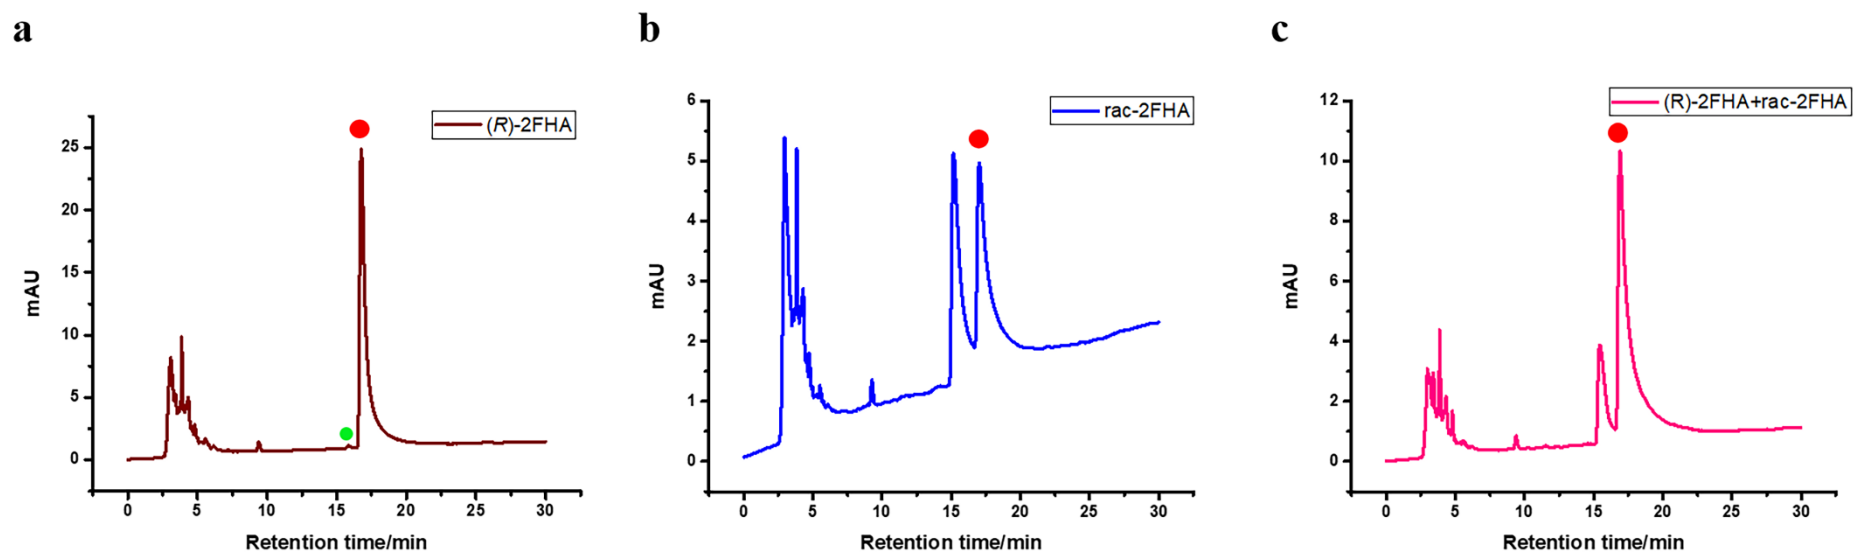

**Figure S7.** The chromatograms of (a) (*R*)-2FHA, (b) racemic 2FHA, and (c) (*R*)-2FHA mixing with racemic 2FHA analyzed by reverse phase chiral HPLC. The *red* dots labeled peak indicates (*R*)-2FHA. The *green* dot labeled peak possibly represents (*S*)-2FHA, its relative proportion to (*R*)-2FHA (99.463%) is 0.537%.



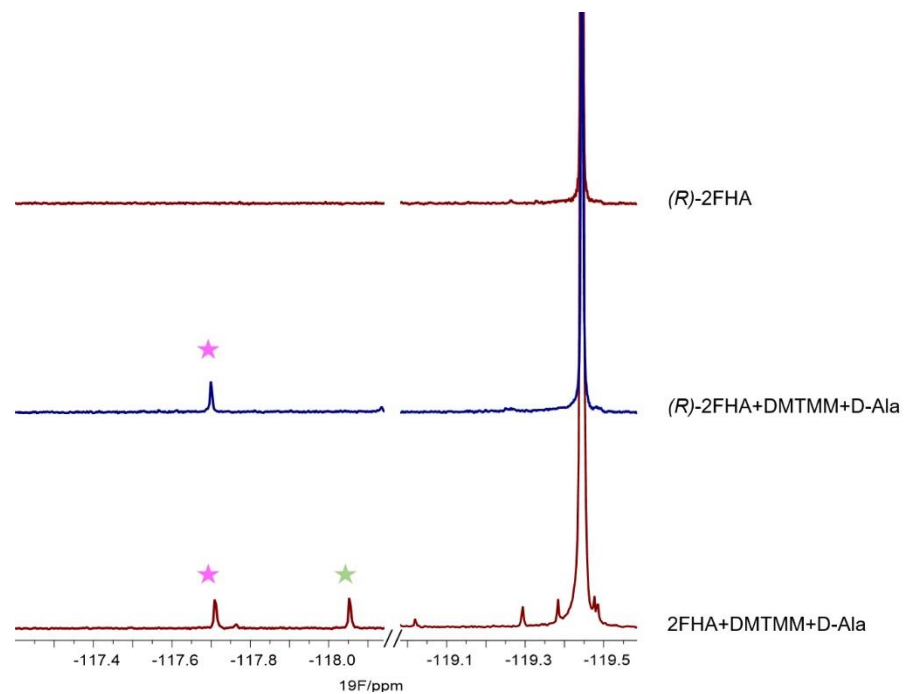

**Figure S8.** D-Ala was modified by  $(R)$ -2FHA and  $rac$ -2FHA. The newly emerged *red* pentacle labeled peaks and *green* pentacle labeled (*red* pentacle labeled) were respectively unambiguously assigned as the resultant derivative  $(R)$ -2FHA-D-Ala and  $(S)$ -2FHA-D-Ala.

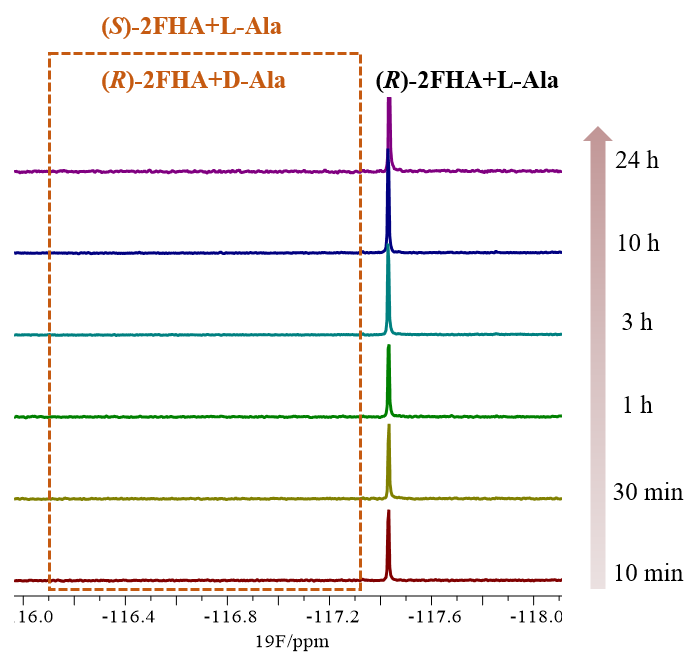

**Figure S9.** Stacked  $^{19}\text{F}$  NMR spectra of  $(R)\text{-2FHA-L-Ala}$  over reaction time. The *orange* box labeled the region indicates the peak of  $(S)\text{-2FHA-L-Ala}$ , which corresponds to its mirror-image  $(R)\text{-2FHA-D-Ala}$ .

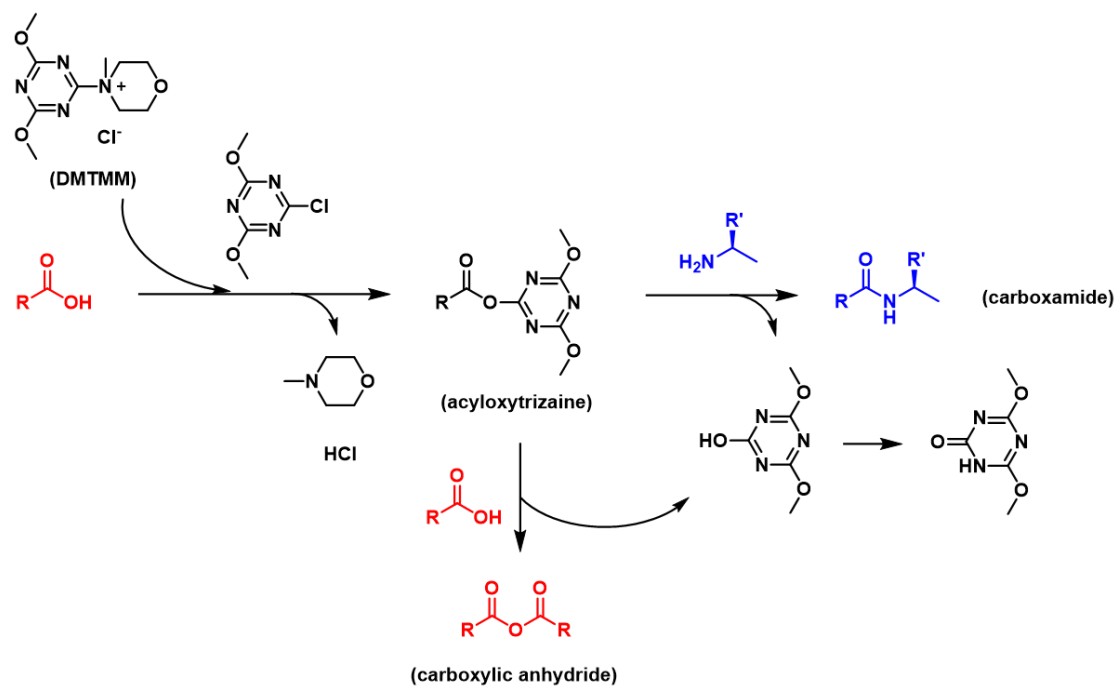

**Figure S10.** Mechanism of condensation reaction mediated by DMTMM.

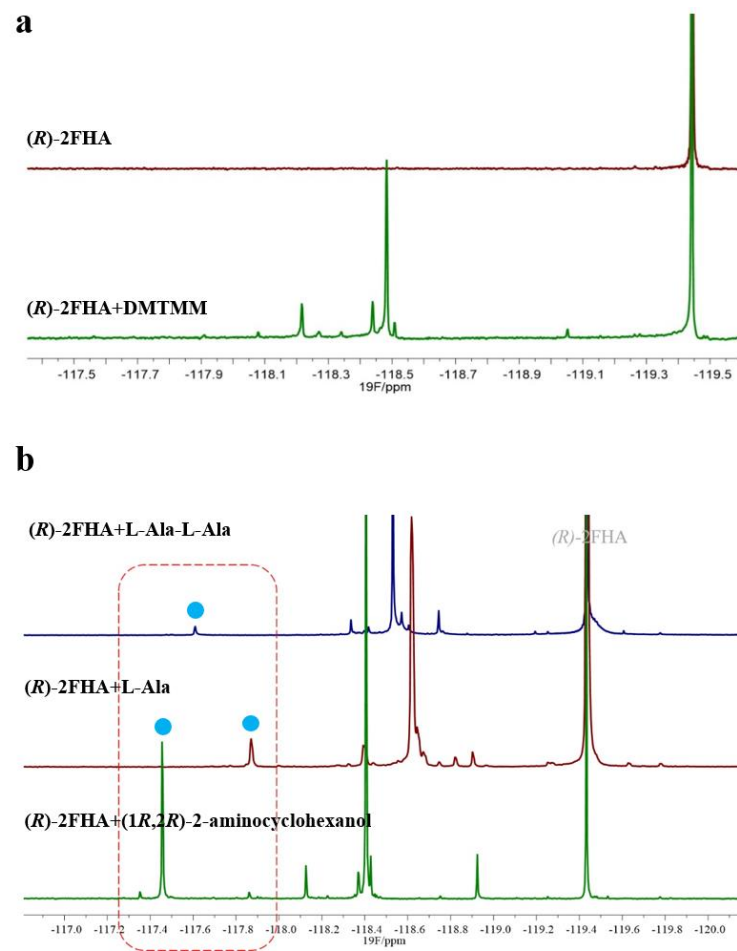

**Figure S11.** Full  $^{19}\text{F}$  NMR spectra of (a)  $(R)$ -2FHA and  $(R)$ -2FHA treatment with DMTMM. (b) Stacked full  $^{19}\text{F}$  NMR spectra of  $(R)$ -2FHA labelling L-Ala-L-Ala, L-Ala, and (1*R*,2*R*)-2-aminocyclohexanol. The sky-blue dot labeled peaks represented the target products.

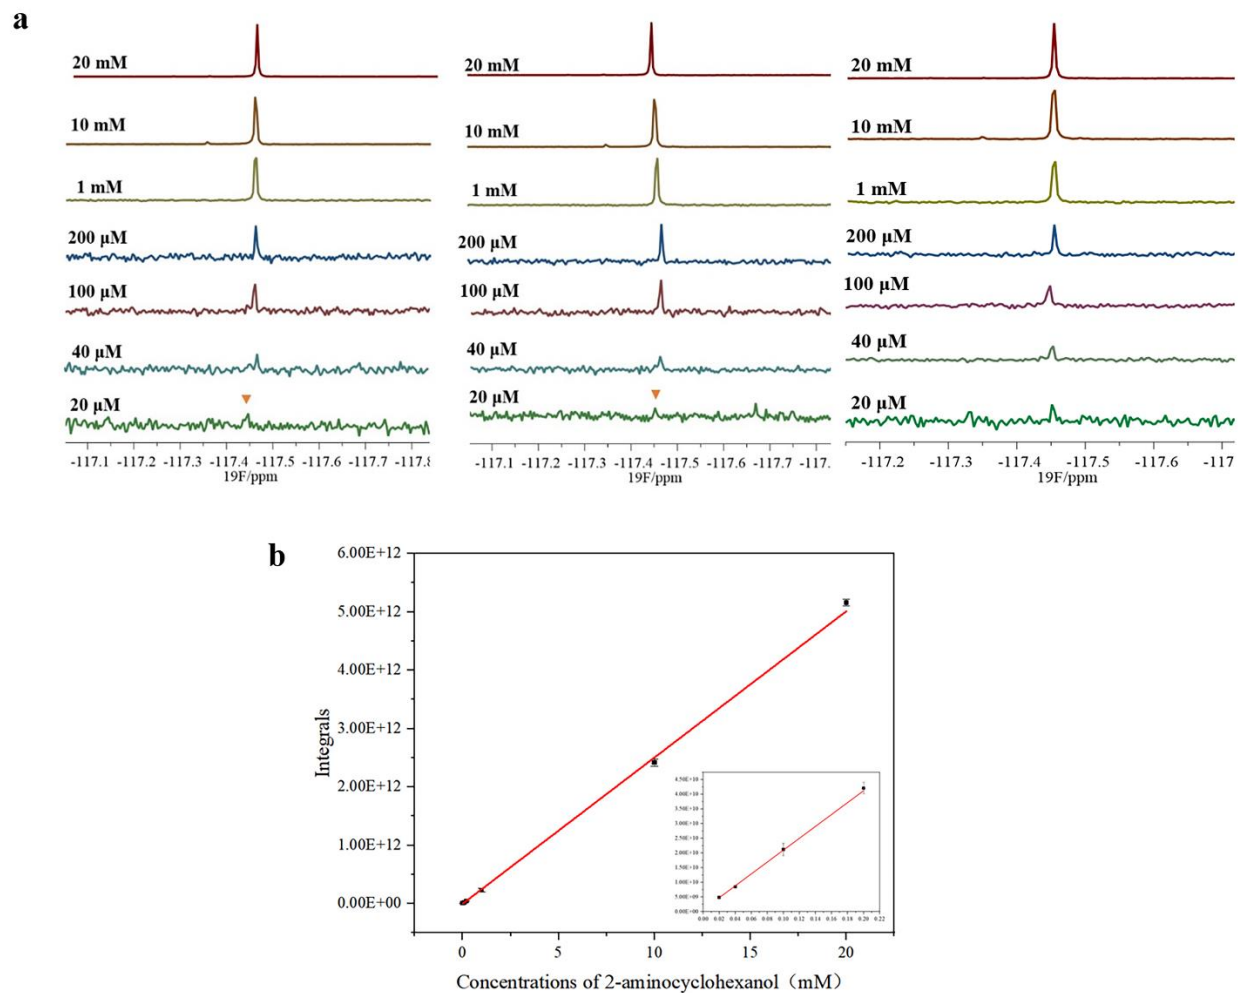

**Figure S12.** Limit of detection of (*1R,2R*)-2-aminocyclohexanol (*(1R,2R)-f*) measured by (*R*)-2FHA. (a) Superimpositions of the  $^{19}\text{F}$  NMR

spectra of (*R*)-2FHA labelling different concentrations of (*1R,2R*)-*f* (20  $\mu$ M, 40  $\mu$ M, 100  $\mu$ M, 200  $\mu$ M, 1 mM, 10 mM, 20 mM). Three stacked spectra represent the independent triplicated experiments. (b) The integrals of  $^{19}\text{F}$  NMR (512 scans) signals of (*R*)-2FHA-(*1R,2R*)-*f* change with the increase in concentrations of (*1R,2R*)-*f* ( $y=2.024\text{E}11x+7.41\text{E}8$ ,  $R^2=0.997$ ). The error bars were calculated from the three triplicated experiments. The embedded figure was amplified from the region between 20  $\mu$ M and 1 mM.

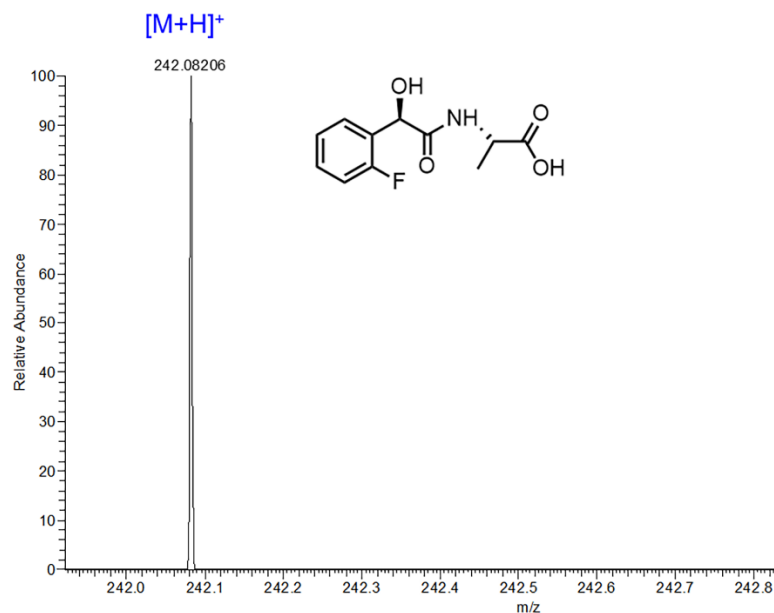

**Figure S13.** High-resolution ESI-MS (HRMS) analysis of the derivative (*R*)-2FHA-D-Ala. HRMS: 242.0821 (calculated  $[\text{M}+\text{H}]^+$ ), 242.0820 (observed  $[\text{M}+\text{H}]^+$ ).

**Table S1.** Biogenic amino acids discussed in this work. The  $^{19}\text{F}$  chemical shifts and  $\Delta\Delta\delta(^{19}\text{F})$  values, and enantiodiscrimination factors ( $\Delta\Delta\delta/\text{linewidth}$ ) were listed.

| Entry | Amine acid | D<br>$\delta(^{19}\text{F})/\text{ppm}$ | L<br>$\delta(^{19}\text{F})/\text{ppm}$ | $\Delta\Delta\delta(^{19}\text{F})/\text{Hz}$ | $\Delta\Delta\delta(^{19}\text{F})/\text{ppm}$ | D<br>linewidth/Hz   | L<br>linewidth/Hz   | $\Delta\Delta\delta/\text{linewidth}$ |
|-------|------------|-----------------------------------------|-----------------------------------------|-----------------------------------------------|------------------------------------------------|---------------------|---------------------|---------------------------------------|
| 1     | Gly        | -119.076                                |                                         | —                                             | —                                              | 2.44                |                     | —                                     |
| 2     | Ala        | -117.699                                | -117.980                                | 132.247                                       | 0.281                                          | 4.14                | 4.02                | 16.21                                 |
| 3     | Arg        | -117.554                                | -118.011                                | 215.077                                       | 0.457                                          | 4.20                | 3.37                | 28.41                                 |
| 4     | Asp        | -118.007                                | -118.193                                | 87.556                                        | 0.186                                          | 4.34                | 3.32                | 11.43                                 |
| 5     | Asn        | -117.841                                | -118.015                                | 81.889                                        | 0.174                                          | 3.03                | 2.84                | 13.95                                 |
| 6     | Cys        | -117.767                                | -118.144                                | 177.427                                       | 0.377                                          | 4.00                | 5.46                | 18.76                                 |
| 7     | Gln        | -117.691                                | -117.892                                | 94.596                                        | 0.201                                          | 4.27                | 3.02                | 12.98                                 |
| 8     | Glu        | -117.661                                | -117.918                                | 120.951                                       | 0.257                                          | 3.21                | 3.21                | 18.84                                 |
| 9     | His        | -117.748                                | -117.879                                | 61.652                                        | 0.131                                          | 3.75                | 4.21                | 7.75                                  |
| 10    | Ile        | -117.417                                | -117.767                                | 164.622                                       | 0.35                                           | 5.80                | 5.35                | 14.76                                 |
| 11    | Leu        | -117.733                                | -118.159                                | 200.488                                       | 0.426                                          | 3.61                | 4.22                | 25.61                                 |
| 12    | Lys        | -117.560                                | -117.870                                | 145.895 <sup>(a)</sup>                        | 0.31 <sup>(a)</sup>                            | 3.81 <sup>(a)</sup> | 3.14 <sup>(a)</sup> | 20.99 <sup>(a)</sup>                  |
|       |            | -117.827                                | -117.992                                | 77.653 <sup>(e)</sup>                         | 0.165 <sup>(e)</sup>                           | 3.17 <sup>(e)</sup> | 3.14 <sup>(e)</sup> | 12.31 <sup>(e)</sup>                  |
| 13    | Met        | -117.621                                | -117.922                                | 141.659                                       | 0.301                                          | 2.93                | 3.83                | 20.96                                 |
| 14    | Phe        | -118.052                                | -118.220                                | 79.083                                        | 0.168                                          | 3.55                | 3.66                | 10.97                                 |
| 15    | Pro        | -117.572                                | -117.129                                | 208.533                                       | 0.443                                          | 1.51                | 2.12                | 57.45                                 |
| 16    | Ser        | -117.793                                | -117.798                                | 2.353                                         | 0.005                                          | 4.14                | 3.94                | 0.29                                  |
| 17    | Thr        | -117.493                                | -117.895                                | 189.193                                       | 0.402                                          | 3.71                | 3.53                | 26.13                                 |
| 18    | Trp        | -118.118                                | -118.188                                | 32.944                                        | 0.07                                           | 2.80                | 2.80                | 5.88                                  |
| 19    | Val        | -117.426                                | -117.818                                | 184.486                                       | 0.392                                          | 3.73                | 4.40                | 22.69                                 |

**Table S2.** Mirror-image dipeptides analyzed in the current work, the  $^{19}\text{F}$  chemical shifts of the resultant derivatives and their  $\Delta\Delta\delta(^{19}\text{F})$  values as well as enantioresolution factors were clearly presented.

| Dipeptides     | DD<br>$\delta(^{19}\text{F})/\text{ppm}$ | LL<br>$\delta(^{19}\text{F})/\text{ppm}$ | $\Delta\Delta\delta(^{19}\text{F})/\text{Hz}$ | $\Delta\Delta\delta(^{19}\text{F})/\text{ppm}$ | DD<br>linewidth/Hz | LL<br>linewidth/Hz | $\Delta\Delta\delta/\text{linewidth}$ |
|----------------|------------------------------------------|------------------------------------------|-----------------------------------------------|------------------------------------------------|--------------------|--------------------|---------------------------------------|
| <b>Phe-Phe</b> | -117.613                                 | -117.705                                 | 43.24                                         | 0.092                                          | 2.85               | 2.25               | 8.48                                  |
| <b>Ala-Ala</b> | -117.619                                 | -117.881                                 | 123.14                                        | 0.262                                          | 3.58               | 3.82               | 16.64                                 |
| <b>Val-Val</b> | -117.38                                  | -117.652                                 | 127.84                                        | 0.272                                          | 3.39               | 2.49               | 21.74                                 |
| <b>Leu-Leu</b> | -117.69                                  | -118.024                                 | 156.98                                        | 0.334                                          | 5.51               | 4.66               | 15.44                                 |

| Dipeptides     | DD<br>$\delta(^{19}\text{F})/\text{ppm}$ | LL<br>$\delta(^{19}\text{F})/\text{ppm}$ | DL<br>$\delta(^{19}\text{F})/\text{ppm}$ | LD<br>$\delta(^{19}\text{F})/\text{ppm}$ | $\Delta\Delta\delta(^{19}\text{F})/\text{Hz}$ | $\Delta\Delta\delta(^{19}\text{F})/\text{ppm}$ | DD<br>linewidth/Hz | LL<br>linewidth/Hz | DL<br>linewidth/Hz | LD<br>linewidth/Hz | $\Delta\Delta\delta/\text{linewidth}$ |
|----------------|------------------------------------------|------------------------------------------|------------------------------------------|------------------------------------------|-----------------------------------------------|------------------------------------------------|--------------------|--------------------|--------------------|--------------------|---------------------------------------|
| <b>Ser-His</b> | -118.119                                 | -118.263                                 | —                                        | —                                        | 67.78                                         | 0.144                                          | 6.04               | 5.49               | —                  | —                  | 5.88                                  |
| <b>Ser-His</b> | —                                        | —                                        | -118.077                                 | -118.158                                 | 38.13                                         | 0.081                                          | —                  | —                  | 5.49               | 4.67               | 3.75                                  |
| <b>His-Ser</b> | -118.031                                 | -118.206                                 | —                                        | —                                        | 82.38                                         | 0.175                                          | 7.14               | 2.20               | —                  | —                  | 8.82                                  |
| <b>His-Ser</b> | —                                        | —                                        | -118.064                                 | -118.239                                 | 82.38                                         | 0.175                                          | —                  | —                  | 6.04               | 5.49               | 7.14                                  |



**Table S3.** Chiral non-AAs amines discussed in this work, the  $\Delta\Delta\delta(^{19}\text{F})$  values and enantioresolution factors were definitely determined.

| Entry    | Non-AAs amines              | D<br>$\delta(^{19}\text{F})/\text{ppm}$ | L<br>$\delta(^{19}\text{F})/\text{ppm}$ | $\Delta\Delta\delta(^{19}\text{F})/\text{Hz}$ | $\Delta\Delta\delta(^{19}\text{F})/\text{ppm}$ | D<br>linewidth | L<br>linewidth | $\Delta\Delta\delta/\text{linewidth}$ |
|----------|-----------------------------|-----------------------------------------|-----------------------------------------|-----------------------------------------------|------------------------------------------------|----------------|----------------|---------------------------------------|
| <i>a</i> | 2-aminooctane               | -117.760                                | -117.765                                | 2.35                                          | 0.005                                          | —              | —              | —                                     |
| <i>b</i> | 3-aminoheptane              | -117.667                                | -117.772                                | 49.35                                         | 0.105                                          | 2.41           | 3.04           | 9.06                                  |
| <i>c</i> | 2-aminobutane               | -117.637                                | -117.747                                | 51.7                                          | 0.11                                           | 2.83           | 3.60           | 8.04                                  |
| <i>d</i> | 1,2-dimethylpropylamine     | -117.572                                | -117.751                                | 84.13                                         | 0.179                                          | 2.51           | 2.20           | 17.86                                 |
| <i>e</i> | 1-methoxy-2-propylamine     | -117.675                                | -117.762                                | 40.89                                         | 0.087                                          | 2.19           | 2.83           | 8.15                                  |
| <i>f</i> | 2-aminocyclohexanol         | -117.446                                | -117.846                                | 188                                           | 0.4                                            | 4.04           | 3.79           | 24.01                                 |
| <i>g</i> | valinol                     | -117.486                                | -117.957                                | 221.37                                        | 0.471                                          | 2.67           | 2.67           | 41.46                                 |
| <i>h</i> | 1-aminoindan                | -117.467                                | -117.592                                | 58.75                                         | 0.125                                          | 4.06           | 3.75           | 7.52                                  |
| <i>i</i> | phenylalaninol              | -117.877                                | -117.892                                | 7.05                                          | 0.015                                          | 2.36           | 2.36           | 1.49                                  |
| <i>j</i> | $\alpha$ -methylbenzylamine | -117.672                                | -117.695                                | 10.81                                         | 0.023                                          | 2.35           | 2.82           | 2.09                                  |

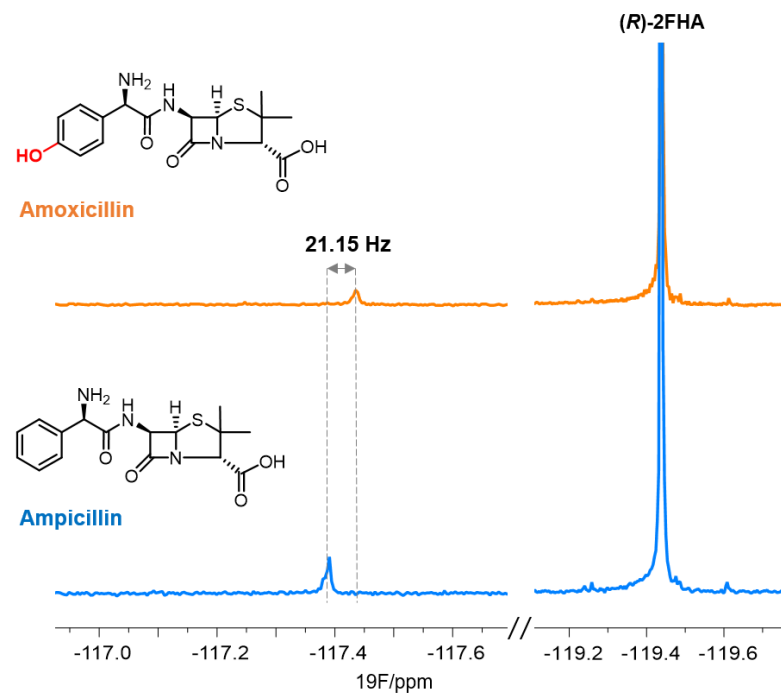

**Figure S14.** Discrimination of the antibiotics amoxicillin and ampicillin by (R)-TFHA. The difference of  $^{19}\text{F}$  chemical shifts between (R)-TFHA labeled amoxicillin and ampicillin was determined to be 21.15 Hz.

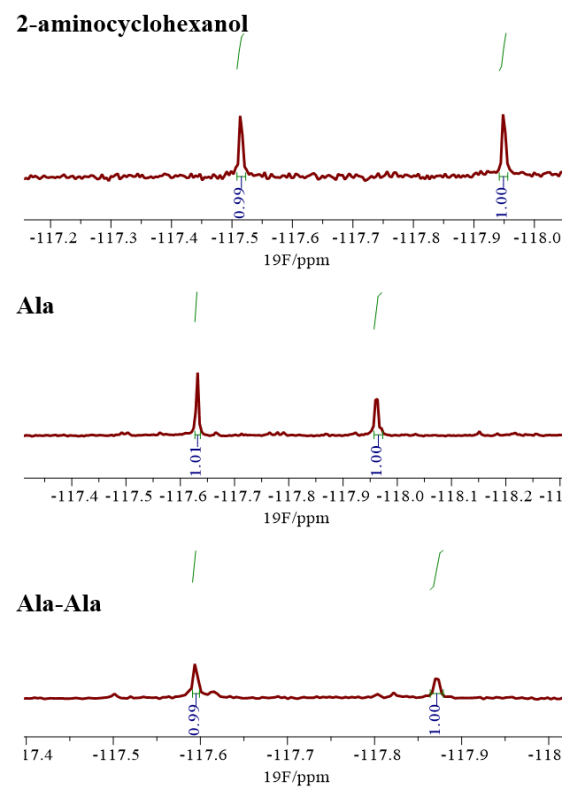

**Figure S15.** Differentiation of the racemic solutions of 2-aminocyclohexanol (*f*), Ala, and Ala-Ala by (*R*)-2FHA. The integrals of each signal were clearly labeled.

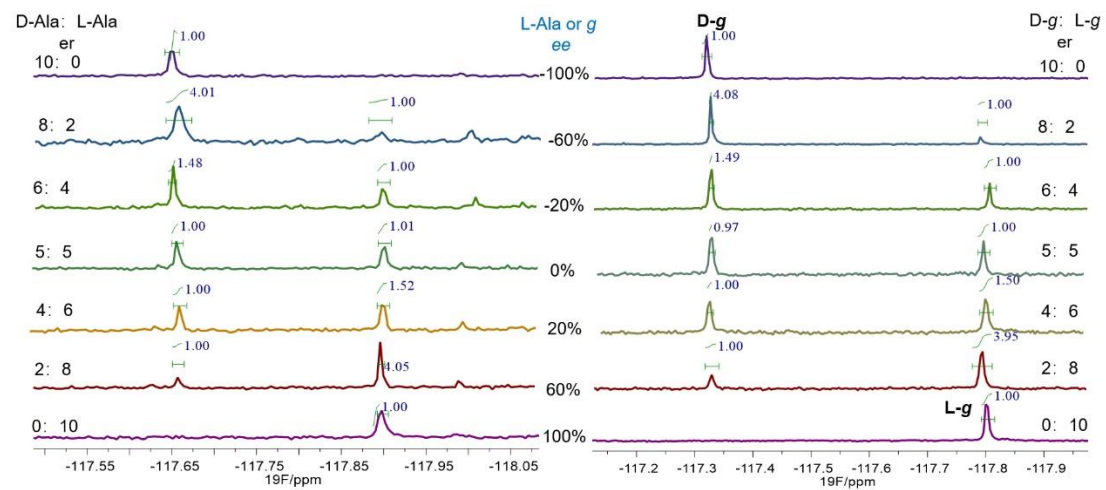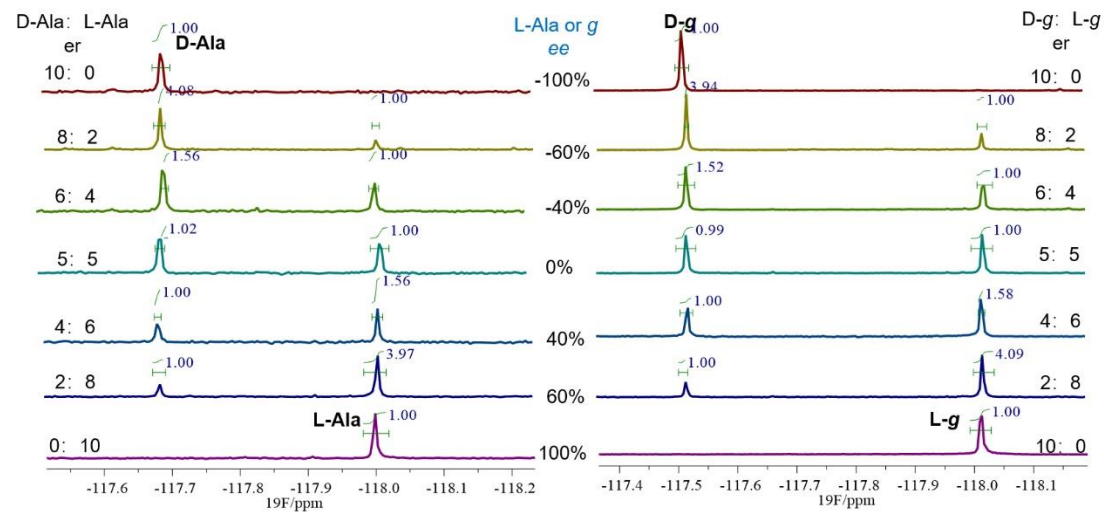

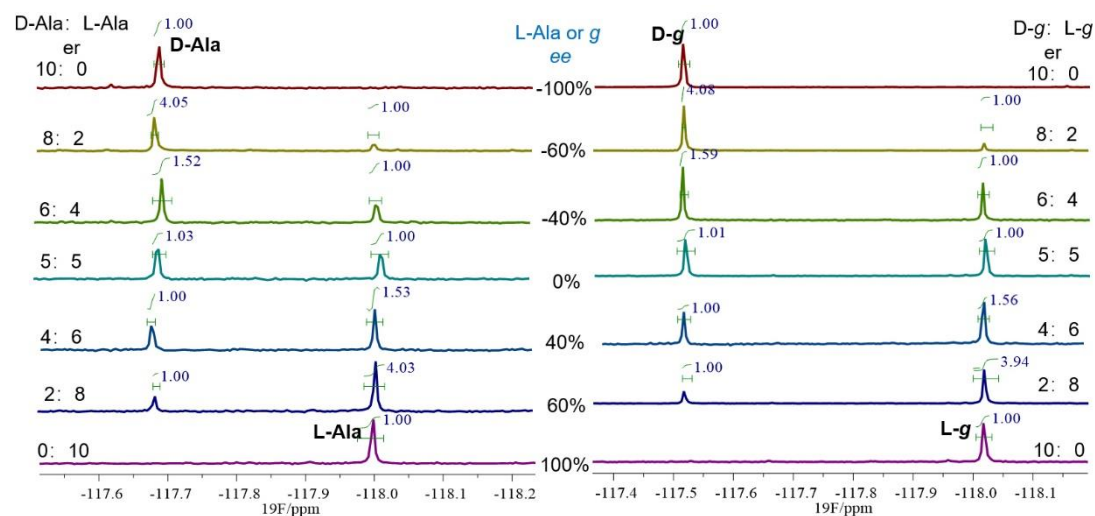

**Figure S16.** Determination of *ee* values of L-Ala or D-valinol (D-*g*) in nonracemic solutions (the independent triplicated experiments). The relative  $^{19}\text{F}$  integrals (D-Ala *versus* L-Ala, D-*g* *versus* L-*g*) in a spectrum were clearly shown ( $^{19}\text{F}$  NMR: EtOH with 10% (v/v) DMSO-*d*<sub>6</sub>; transmitter frequency 470.63 MHz; 64 scans.)

**Table S4.** Determination of *de* and *dr* values of L-Ala or D-valinol (D-*g*) in the non-racemic solutions. The calculated *de* and *dr* by the integrals of <sup>19</sup>F resonance signals were clearly presented, and SD represents the error on each *de* or *dr* value. The *de*, *dr* and SD values were obtained from the independent triplicated experiments.

| L-Ala | <i>ee</i><br>(%,by theoretical) | <i>er</i><br>(%,by theoretical) | <i>de</i><br>(%,by NMR) | SD<br>(%) | <i>dr</i><br>(%,by NMR) | SD<br>(%) |
|-------|---------------------------------|---------------------------------|-------------------------|-----------|-------------------------|-----------|
|       | 100                             | 10                              | 100                     | 0         | 10                      | 0         |
|       |                                 |                                 | 100                     |           | 10                      |           |
|       |                                 |                                 | 100                     |           | 10                      |           |
|       | 60                              | 4                               | 60.08                   | 0.27      | 4.01                    | 0.03      |
|       |                                 |                                 | 60.62                   |           | 4.08                    |           |
|       |                                 |                                 | 60.39                   |           | 4.05                    |           |
|       | 20                              | 1.5                             | 19.35                   | 1.26      | 1.48                    | 0.04      |
|       |                                 |                                 | 20.63                   |           | 1.52                    |           |
|       |                                 |                                 | 21.87                   |           | 1.56                    |           |
|       | 0                               | 1                               | -0.49                   | 1.02      | 0.99                    | 0.02      |
|       |                                 |                                 | 0.99                    |           | 1.02                    |           |
|       |                                 |                                 | 1.47                    |           | 1.03                    |           |
|       | -20                             | 0.67                            | -20.63                  | 0.47      | 0.66                    | 0.01      |
|       |                                 |                                 | -21.56                  |           | 0.64                    |           |
|       |                                 |                                 | -20.94                  |           | 0.65                    |           |
|       | -60                             | 0.25                            | -60.40                  | 0.66      | 0.25                    | 0.01      |
|       |                                 |                                 | -61.16                  |           | 0.24                    |           |
|       |                                 |                                 | -59.84                  |           | 0.25                    |           |
|       | -100                            | 0                               | -100                    | 0         | 0                       | 0         |
|       |                                 |                                 | -100                    |           | 0                       |           |
|       |                                 |                                 | -100                    |           | 0                       |           |

| <b>D-g</b> | <i>ee</i><br>(%,by theoretical) | <i>er</i><br>(%,by theoretical) | <i>de</i><br>(%,by NMR) | <b>SD</b><br>(%) | <i>dr</i><br>(%,by NMR) | <b>SD</b><br>(%) |
|------------|---------------------------------|---------------------------------|-------------------------|------------------|-------------------------|------------------|
|            | 100                             | 10                              | 100                     | 0                | 10                      | 0                |
|            |                                 |                                 | 100                     |                  | 10                      |                  |
|            |                                 |                                 | 100                     |                  | 10                      |                  |
|            | 60                              | 4                               | 60.63                   | 0.64             | 4.08                    | 0.08             |
|            |                                 |                                 | 60.62                   |                  | 4.08                    |                  |
|            |                                 |                                 | 59.51                   |                  | 3.94                    |                  |
|            | 20                              | 1.5                             | 19.68                   | 1.58             | 1.49                    | 0.05             |
|            |                                 |                                 | 20.63                   |                  | 1.52                    |                  |
|            |                                 |                                 | 22.77                   |                  | 1.59                    |                  |
|            | 0                               | 1                               | 1.52                    | 0.59             | 0.97                    | 0.02             |
|            |                                 |                                 | 0.50                    |                  | 0.99                    |                  |
|            |                                 |                                 | 0.49                    |                  | 1.01                    |                  |
|            | -20                             | 0.67                            | -20                     | 1.29             | 0.67                    | 0.02             |
|            |                                 |                                 | -21.87                  |                  | 0.64                    |                  |
|            |                                 |                                 | -22.48                  |                  | 0.63                    |                  |
|            | -60                             | 0.25                            | -59.59                  | 1.23             | 0.25                    | 0.01             |
|            |                                 |                                 | -61.31                  |                  | 0.24                    |                  |
|            |                                 |                                 | -58.93                  |                  | 0.25                    |                  |
|            | -100                            | 0                               | -100                    | 0                | 0                       | 0                |
|            |                                 |                                 | -100                    |                  | 0                       |                  |
|            |                                 |                                 | -100                    |                  | 0                       |                  |

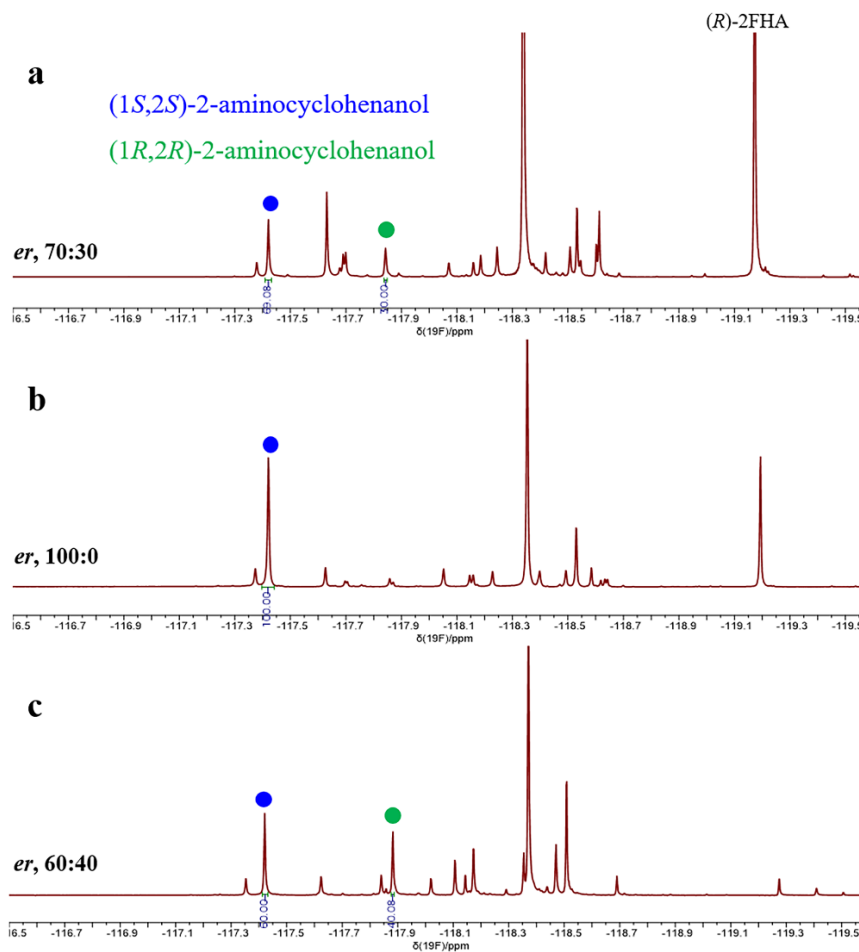

**Figure S17.** Determination of *dr* of 2-aminocyclohexanol (*f*) in the complex mixtures at different concentrations. The blue and red dots labeled peaks indicate (*R*)-2FHA-(1*S*,2*S*)-2-aminocyclohexanol and (*R*)-2FHA-(1*R*,2*R*)-2-aminocyclohexanol. The integrals of their  $^{19}\text{F}$  NMR resonance signals were display.



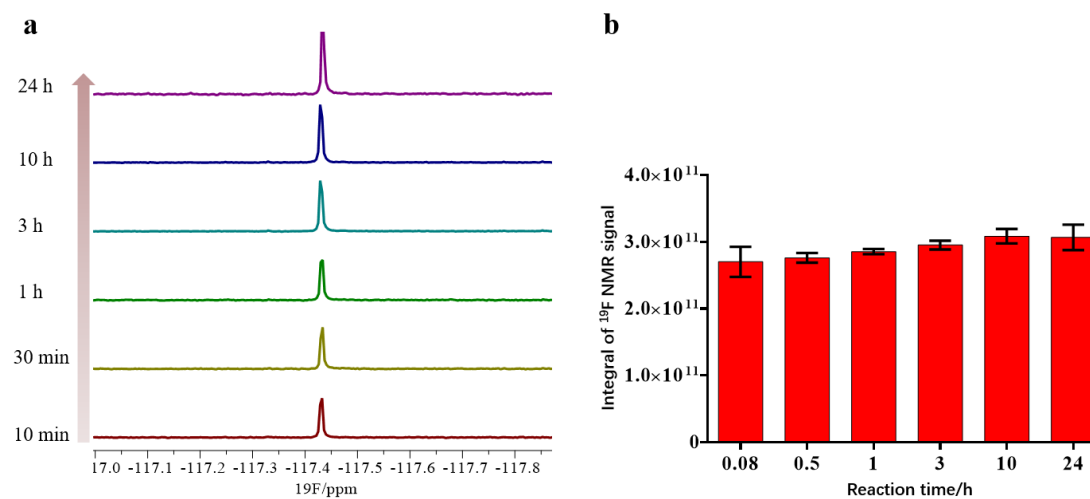

**Figure S18.** Monitoring the  $^{19}\text{F}$  NMR signal intensity of the resultant derivative (*R*)-2FHA-L-Ala. (a) Stacked  $^{19}\text{F}$  NMR spectra of (*R*)-2FHA-L-Ala over reaction time. (b) Histogram of integral of  $^{19}\text{F}$  NMR signal of (*R*)-2FHA-L-Ala *versus* reaction time.
